# Supplementary material
Source: MDPI journal article supplement (https://www.mdpi.com/2504-5377/2/3/29)
Supplement: s1 [file s1]

## Supplementary Materials

# Hydrophobic Forces Are Relevant to Bacteria-Nanoparticle Interactions: *Pseudomonas putida* Capture Efficiency by Using Arginine, Cysteine or Oxalate Wrapped Magnetic Nanoparticles

Federico Figueredo <sup>1</sup>, Albert Saavedra <sup>1</sup>, Eduardo Cortón <sup>1,\*</sup> and Virginia E. Diz <sup>2,\*</sup>

<sup>1</sup> Laboratory of Biosensors and Bioanalysis (LABB), Biochemistry Department, IQUIBICEN-CONICET, FCEN, UBA, Buenos Aires 1428, Argentina; figueredofederico@yahoo.com (F.F.); albert.saavedra.olaya@gmail.com (A.S.)

<sup>2</sup> Departamento de Química Inorgánica, Analítica y Química Física, FCEN, UBA, Buenos Aires 1428, Argentina

\* Correspondence: eduardo@qb.fcen.uba.ar (E.C.); dizvirginia@gmail.com (V.E.D.);  
Tel.: +54-11-4576-3342 (E.C.)

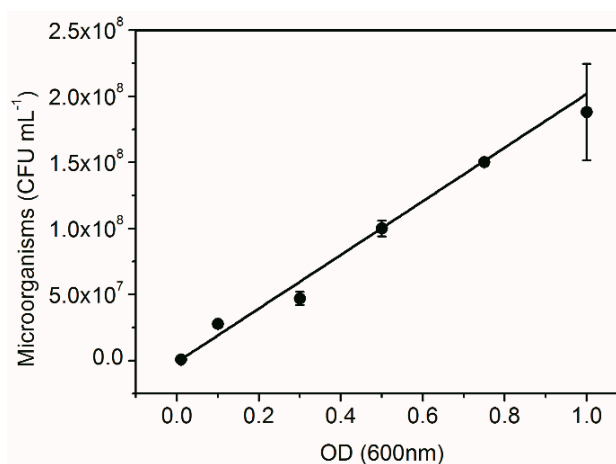

**Figure S1.** *P. putida* cells concentration and optical density relationship, used to calculate the amount of cells used in the bacteria capture assays.

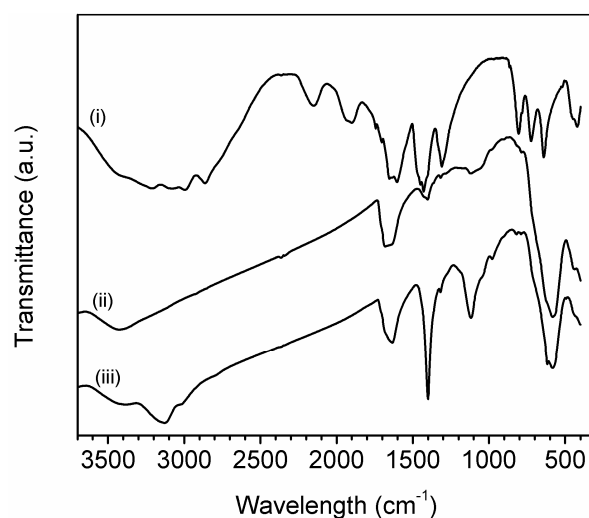

**Figure S2.** FT-IR spectra for (i) ammonium oxalate and the synthesis product obtained with molar ratio of  $\text{Fe}^{3+}:\text{Fe}^{2+}:\text{C}_2\text{O}_4^{2-}$  equal to (ii) 2:1:0.1 and (iii) 2:1:1.

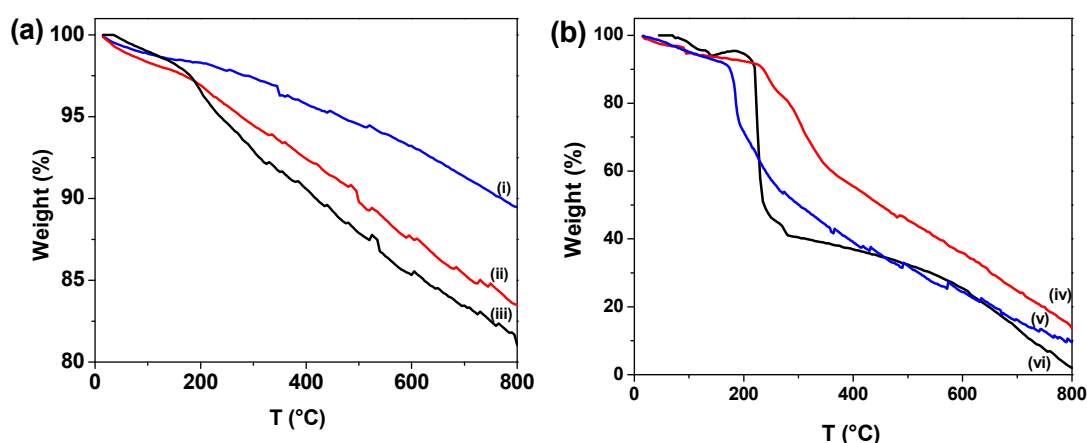

**Figure S3.** TGA curves of NPs and their organic outside layer. a: (i) Fe<sub>3</sub>O<sub>4</sub>@Cys, (ii) Fe<sub>3</sub>O<sub>4</sub>@Arg and (iii) Fe<sub>3</sub>O<sub>4</sub>@Oxa, and b: (iv) L-Arg, (v) L-Cys, (vi) oxalate.

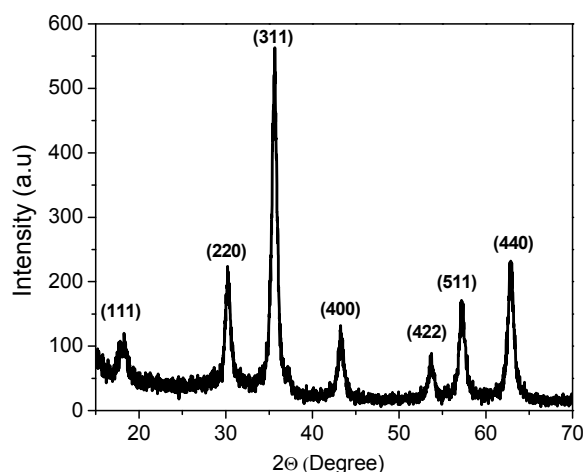

**Figure S4.** X-ray diffraction patterns of NPs functionalized with arginine (Fe<sub>3</sub>O<sub>4</sub>@Arg). Similar results were obtained with oxalate and cysteine wrapped NPs.

## Contact angle experiments

### Methodology

To study the degree of hydrophobicity of the synthesized NPs, first 0.5 mg of each NP were weighted and suspended in 300 µL of exanol, by using a vortex. Then, 100 µL of each obtained suspension was speeded by the froth technique, over a glass slide, obtaining a homogenous film. After that the film was dried under an IR lamp, and later (after cooling) a 50 µL drop of water was carefully disposed over the film, and the contact angles were registered.

### Results

The degree of hydrophobicity obtained to the NPs, determined by the measurement of the contact angles show the following tendency: Fe<sub>3</sub>O<sub>4</sub>@Arg > Fe<sub>3</sub>O<sub>4</sub>@Cys > Fe<sub>3</sub>O<sub>4</sub>@Oxa. The measured angles were 39.5°, 32.0° and 26.5°, respectively (Fig. S5).

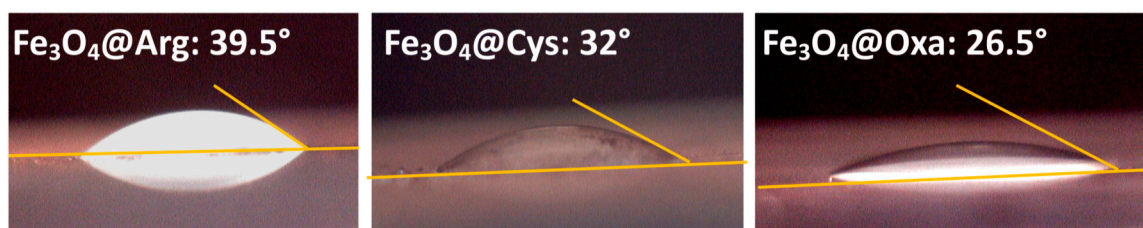

**Figure S5.** Contact angle experiment. NPs were disposed over a glass slide by means of the frotis technique, and a drop of water was disposed over the film.
